# Supplementary material for: Effect of fluorocarbon chains on the mesomorphic properties of chiral imines and their complexes with copper(II)
Source: Royal Society of Chemistry journal article supplement (doi:10.1039/b905104j), 2009-01-01
Supplement: b905104j.pdf [file b905104j.pdf]

## Electronic Supporting Information

### Effect of fluorocarbon chains on the mesomorphic properties of chiral imines and their complexes with copper(II)

Hale Ocak<sup>a</sup>, Belkız Bilgin-Eran<sup>a\*</sup>, Carsten Tschierske<sup>b</sup>, Ute Baumeister<sup>c</sup> and Gerhard Pelzl<sup>c</sup>

<sup>a</sup>Department of Chemistry, Yildiz Technical University, Davutpaşa Yerleşim Birimi, TR-34210 Esenler, Istanbul, Turkey

<sup>b</sup>Institute of Chemistry, Organic Chemistry, Martin-Luther University Halle-Wittenberg, Kurt Mothes-Str. 2, D-06120 Halle, Germany

<sup>c</sup>Institute of Chemistry, Physical Chemistry, Martin-Luther University Halle-Wittenberg, Mühlpforte 1, D-06118 Halle, Germany

#### 1. Experimental conditions for X-ray scattering and additional X-ray data

For X-ray scattering, powder-like samples were kept in glass capillaries (diameter 1 mm) and mounted in a temperature-controlled heating stage. Film patterns were recorded using a Guinier camera (Huber, Germany) and quartz-monochromatized CuK $\alpha$  radiation and calibrated by the powder pattern of Pb(NO<sub>3</sub>)<sub>2</sub>. Two-dimensional patterns were obtained from surface-alignment samples on a glass plate. The X-ray beam (Ni-filtered CuK $\alpha$  radiation) was parallel to the substrate and the diffraction patterns were recorded with an area detector HIStar (Siemens/Bruker, Germany).

**Table S1.** Small-angle X-ray data for **6c** from 2D patterns on heating (see Fig. S4 for  $\theta$ -scans), for **7c** and **8b** from Guinier powder patterns on cooling ( $\theta_{\text{obs}}$ : experimental scattering angle;  $d_{\text{obs}}$ : experimental and  $d_{\text{calc}}$ : calculated  $d$  value;  $n$ : order of the reflection, Layer spacing: used to calculate  $d_{\text{calc}}$  with an error in the order of 0.1 nm).

| Compound  | $T$<br>(°C) | Phase | $\theta_{\text{obs}}$<br>(°) | $d_{\text{obs}}$<br>(nm) | $n$  | $d_{\text{calc}}$<br>(nm) | $d_{\text{obs}}-d_{\text{calc}}$<br>(nm) | Layer spacing<br>$d$ (nm) |
|-----------|-------------|-------|------------------------------|--------------------------|------|---------------------------|------------------------------------------|---------------------------|
| <b>6c</b> | 25          | cr    | 3.396                        | 2.60                     | 1    | 2.72                      | -0.12                                    | 2.72                      |
|           |             |       | 6.498                        | 1.36                     | 2    | 1.36                      | 0.00                                     |                           |
|           |             |       | 9.756                        | 0.91                     | 3    | 0.91                      | 0.00                                     |                           |
|           | 82          | SmC*  | 1.492                        | 2.96                     | 1    | 2.97                      | -0.01                                    | 2.97                      |
|           |             |       | 2.974                        | 1.49                     | 2    | 1.48                      | 0.01                                     |                           |
|           | 85          | SmC*  | 1.488                        | 2.97                     | 1    | 2.97                      | 0.00                                     | 2.97                      |
|           |             |       | 2.977                        | 1.48                     | 2    | 1.48                      | 0.00                                     |                           |
|           | 90          | SmC*  | 1.481                        | 2.98                     | 1    | 2.98                      | 0.00                                     | 2.98                      |
|           |             |       | 2.963                        | 1.49                     | 2    | 1.49                      | 0.00                                     |                           |
|           | 100         | SmC*  | 1.463                        | 3.02                     | 1    | 3.02                      | 0.00                                     | 3.02                      |
|           |             |       | 2.920                        | 1.51                     | 2    | 1.51                      | 0.00                                     |                           |
|           | 110         | SmC*  | 1.442                        | 3.06                     | 1    | 3.07                      | -0.01                                    | 3.07                      |
|           |             |       | 2.880                        | 1.53                     | 2    | 1.53                      | 0.00                                     |                           |
|           | 120         | SmC*  | 1.407                        | 3.14                     | 1    | 3.14                      | 0.00                                     | 3.14                      |
|           |             |       | 2.816                        | 1.57                     | 2    | 1.57                      | 0.00                                     |                           |
|           | 122         | SmC*  | 1.398                        | 3.16                     | 1    | 3.16                      | 0.00                                     | 3.16                      |
|           |             |       | 2.797                        | 1.58                     | 2    | 1.58                      | 0.00                                     |                           |
|           | 124         | SmC*  | 1.387                        | 3.18                     | 1    | 3.18                      | 0.00                                     | 3.18                      |
|           |             |       | 2.777                        | 1.59                     | 2    | 1.59                      | 0.00                                     |                           |
|           | 126         | SmC*  | 1.375                        | 3.21                     | 1    | 3.21                      | 0.00                                     | 3.21                      |
|           |             |       | 2.750                        | 1.61                     | 2    | 1.61                      | 0.00                                     |                           |
|           | 128         | SmC*  | 1.359                        | 3.25                     | 1    | 3.26                      | -0.01                                    | 3.26                      |
|           |             |       | 2.707                        | 1.63                     | 2    | 1.63                      | 0.00                                     |                           |
|           | 130         | SmA   | 1.348                        | 3.28                     | 1    | 3.28                      | -0.01                                    | 3.28                      |
|           |             |       | 2.688                        | 1.64                     | 2    | 1.64                      | 0.00                                     |                           |
|           | 140         | SmA   | 1.344                        | 3.29                     | 1    | 3.29                      | 0.00                                     | 3.29                      |
| 2.679     |             |       | 1.65                         | 2                        | 1.65 | 0.00                      |                                          |                           |
| 150       | SmA         | 1.347 | 3.28                         | 1                        | 3.28 | 0.00                      | 3.28                                     |                           |
|           |             | 2.686 | 1.65                         | 2                        | 1.64 | 0.01                      |                                          |                           |
| 160       | SmA         | 1.351 | 3.27                         | 1                        | 3.28 | -0.01                     | 3.28                                     |                           |
|           |             | 2.688 | 1.64                         | 2                        | 1.64 | 0.00                      |                                          |                           |
| 170       | SmA         | 1.357 | 3.25                         | 1                        | 3.26 | -0.01                     | 3.26                                     |                           |
|           |             | 2.704 | 1.63                         | 2                        | 1.63 | 0.00                      |                                          |                           |

**Table S1.** Small-angle X-ray data (cont.)

| Compound  | $T$<br>(°C) | Phase | $\theta_{\text{obs}}$<br>(°) | $d_{\text{obs}}$<br>(nm) | $n$  | $d_{\text{calc}}$<br>(nm) | $d_{\text{obs}}-d_{\text{calc}}$<br>(nm) | Layer spacing<br>$d$ (nm) |
|-----------|-------------|-------|------------------------------|--------------------------|------|---------------------------|------------------------------------------|---------------------------|
| <b>7c</b> | 130         | SmA   | 1.361                        | 3.24                     | 1    |                           |                                          | 3.24                      |
|           | 120         | SmA   | 1.380                        | 3.20                     | 1    |                           |                                          | 3.20                      |
|           | 110         | SmC*  | 1.419                        | 3.11                     | 1    |                           |                                          | 3.11                      |
|           | 100         | SmC*  | 1.453                        | 3.04                     | 1    |                           |                                          | 3.04                      |
|           | 90          | SmC*  | 1.490                        | 2.96                     | 1    |                           |                                          | 2.96                      |
| <b>8b</b> | 185         | SmA   | 1.447                        | 3.05                     | 1    |                           |                                          | 3.05                      |
|           | 175         | SmA   | 1.439                        | 3.07                     | 1    |                           |                                          | 3.07                      |
|           | 165         | SmA   | 1.434                        | 3.08                     | 1    |                           |                                          | 3.08                      |
|           | 155         | SmA   | 1.424                        | 3.10                     | 1    | 3.10                      | 0.00                                     | 3.10                      |
|           |             |       |                              | 2.842                    | 1.55 | 2                         | 1.55                                     | 0.00                      |

**Table S2.** Tilt angle for the molecules of **6c** in the SmC\* phase derived from the  $\chi$  positions for the maxima of the outer diffuse scattering ( $\tau_{\text{obs}}$ ) and from the ratio of the layer spacings in the SmA (at 130 °C near the phase transition to SmC\*) and the SmC\* phase calculated by  $\cos(\tau_{\text{calc}}) = d(T)/d(\text{SmA})$ .  $\tau_{\text{obs}}$  has a relatively large experimental error, first because the alignment of the sample was only partial and second because the lower part of the 2D patterns was shadowed by the heating stage and only the  $\chi$  range above the equator between 90 and 270° could be used (see Fig. S4).

| $T$<br>(°C) | $\chi_1$<br>(°) | $\chi_2$<br>(°) | $\tau_{\text{obs}}$<br>(°) | Layer spacing<br>(nm) | $\tau_{\text{calc}}$<br>(°) |
|-------------|-----------------|-----------------|----------------------------|-----------------------|-----------------------------|
| 82          | 109             | 255             | 17                         | 2.97                  | 25                          |
| 85          | 110             | 255             | 18                         | 2.97                  | 25                          |
| 90          | 109             | 254             | 18                         | 2.98                  | 25                          |
| 100         | 107             | 256             | 16                         | 3.02                  | 23                          |
| 110         | 106             | 258             | 14                         | 3.07                  | 21                          |
| 120         | 102             | 262             | 10                         | 3.14                  | 17                          |
| 122         | 101             | 259             | 11                         | 3.16                  | 16                          |
| 124         | 92              | 264             | 4                          | 3.18                  | 14                          |
| 126         | 91              | 266             | 2                          | 3.21                  | 12                          |
| 128         | 94              | 264             | 5                          | 3.26                  | 6                           |
| 130         | 95              | 267             | 4                          | 3.28                  | 0                           |

## 2. Electrooptical investigations of compound **6c**

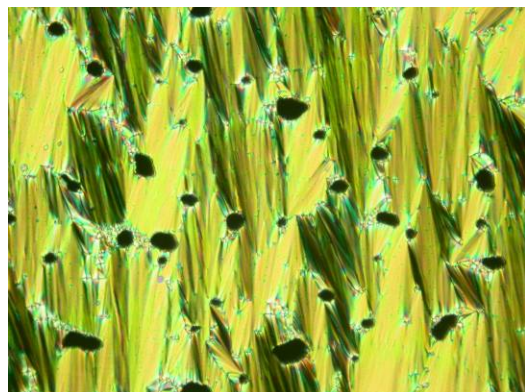

+ 25 V

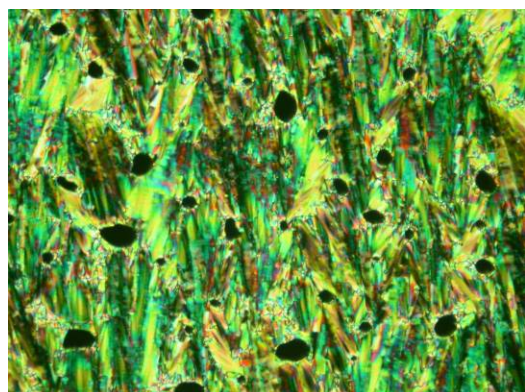

0V

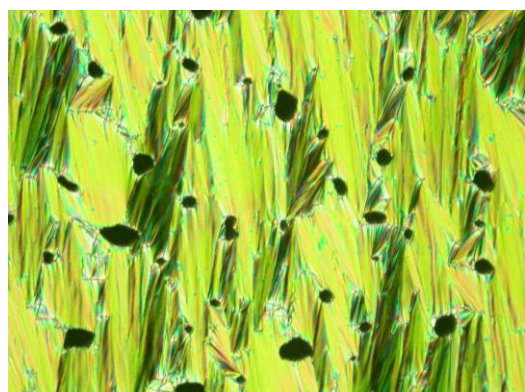

-25V

**Figure S1.** Polar (bistable, ferroelectric) switching of the SmC\* phase of compound **6c** at 110 °C as seen between crossed polarizers (6  $\mu\text{m}$  ITO cell, EHC, Japan).

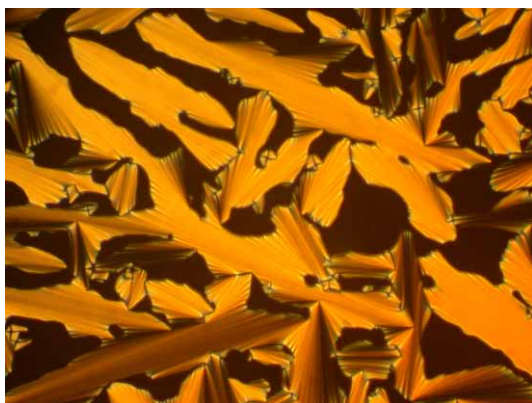

**Figure S2.** Polarised light optical photomicrograph of the SmA phase of **8b** at 179 °C (magnification x 200).

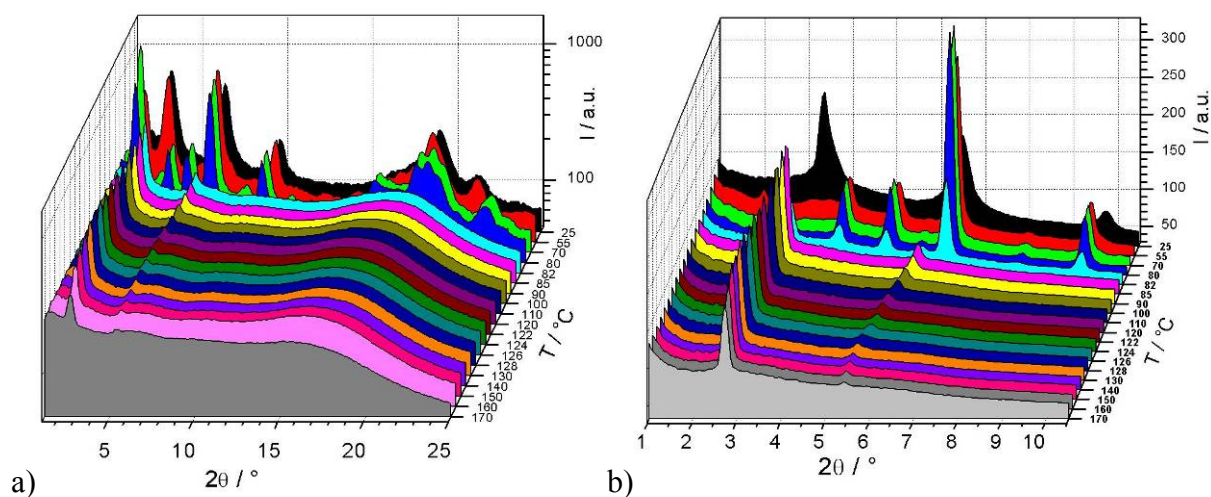

**Figure S3.**  $\theta$ -scans for the 2D X-ray patterns of **6c** on heating, a) wide angle region, b) small angle region.

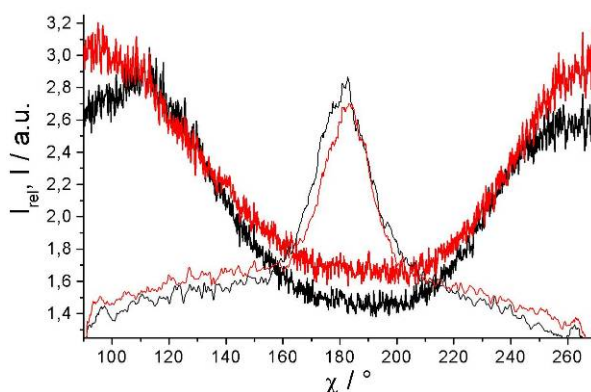

**Figure S4.**  $\chi$  scans for the outer diffuse scattering in the 2D X-ray patterns of **6c** on heating in the SmC\* phase at 85 °C (black line) and in the SmA phase at 150 °C (red line),  $I_{\text{rel}} = I(T)/I(180\text{ °C, isotropic liquid})$ , scans with maxima around 180 ° for the layer reflections for comparison.

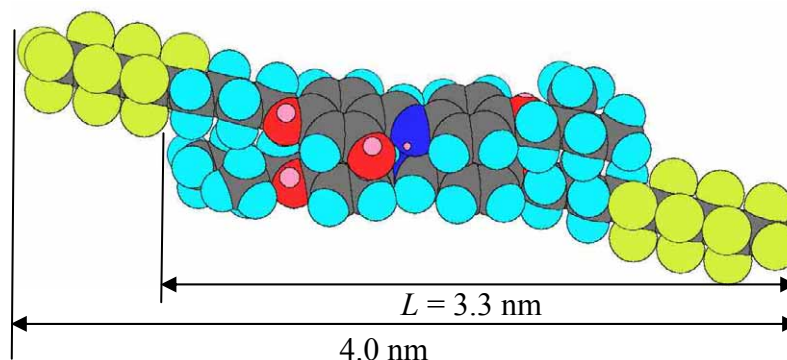

**Figure S5.** Model for a pair of antiparallel molecules of compound **6c** with completely overlapping aliphatic and aromatic moieties.

### 3. Synthesis and analytical data of compounds

The characterization of the synthesized compounds is based on  $^1\text{H}$ -,  $^{13}\text{C}$ -NMR (Varian Unity 500 and Varian Unity 400 spectrometers, in  $\text{CDCl}_3$  solutions, with tetramethylsilane as internal standard), UV-VIS (Agilent 8453,  $\text{CHCl}_3$  solutions). Signals of the aliphatic chains are not given, full  $^1\text{H}$ -NMR and  $^{13}\text{C}$ -NMR spectra are shown in Figures S6/S7 for compound **6c** as an example. FT-IR (Perkin Elmer,  $\text{CHCl}_3$  solutions), MS [AMD 402 (electron impact, 70 eV)]. Microanalyses were performed using a Leco CHNS-932 elemental analyzer. Only structurally relevant resonances are given in the NMR data.

Transition temperatures were measured using a Leitz Laborlux 12 Pol polarizing microscope, equipped with a Linkam THMS 600 hot stage and a Linkam TMS93 temperature controller or a Mettler FP 82 HT hot stage and control unit in conjunction with a Nikon Optiphot 2 polarizing microscope. DSC-thermograms were recorded on a Perkin-Elmer DSC-7, heating and cooling rate:  $10 \text{ K min}^{-1}$ .

The procedures for the preparation of compounds **2** and **3** are given in ref. 17b. 4-decyloxybenzaldehyde (**4a**) and 4-decyloxy-2-hydroxybenzaldehyde (**5a**) were synthesized according to the procedure described in ref. S1a and S1b respectively. (*S*)-(-)-2-Methyl-1-butanol (Fluka, 95.0%,  $[\alpha]_D^{20} -6.3 \pm 0.5^\circ$ ,  $c = 10$  in EtOH), *p*-nitrophenol, 2,4-dihydroxybenzaldehyde, 4-hydroxybenzaldehyde and 1-bromodecan was purchased commercially.

### 3.1. Synthesis of the semifluorinated aldehydes **4b**, **c** and **5b**, **c**:

Following earlier descriptions,<sup>S2</sup> the synthesis was carried out by etherification of 2,4- or 4-hydroxy substituted benzaldehydes (10 mmol) with the corresponding semifluorinated alkyl bromides (11 mmol). The crude products were purified by column chromatography on silica gel, elution with petroleum ether (b.p. 30-70 °C) / ethyl acetate (20:1).

**4b**: Yield: 4.13 g (94 %) of cream crystals, m.p.: 64.9 °C (35.6 kJ mol<sup>-1</sup>). **<sup>1</sup>H-NMR**: δ(ppm) = 11.45 (s; OH), 9.69 (s; CHO), 7.40 (d, *J* ≈ 8.7 Hz; arom. H), 6.50 (dd, *J* ≈ 8.7 Hz and *J* ≈ 2.3 Hz; arom. H), 6.39 (d, *J* ≈ 2.3 Hz; arom. H), 3.99 (t, *J* ≈ 6.3 Hz; OCH<sub>2</sub>). **<sup>13</sup>C-NMR**: δ(ppm) = 194.12 (d; CHO), 166.19, 164.44, 115.10 (3s; 3 arom. C), 135.12, 108.63, 101.08 (3d; 3 arom. CH), 68.25 (t; OCH<sub>2</sub>). **UV-VIS**: λ(nm) = 283.0, 316.0. **IR**: γ(cm<sup>-1</sup>) = 1630 (C=O).

**4c**: Yield: 4.86 g (95 %) of white crystals, m.p.: 65.2 °C (21.1 kJ mol<sup>-1</sup>). **<sup>1</sup>H-NMR**: δ(ppm) = 11.45 (s; OH), 9.70 (s; CHO), 7.41 (d, *J* ≈ 8.7 Hz; arom. H), 6.51 (dd, *J* ≈ 8.7 Hz and *J* ≈ 2.3 Hz; arom. H), 6.40 (d, *J* ≈ 2.3 Hz; arom. H), 4.04 (t, *J* ≈ 5.9 Hz; OCH<sub>2</sub>). **<sup>13</sup>C-NMR**: δ(ppm) = 194.18 (d; CHO), 165.87, 164.42, 115.24 (3s; 3 arom. C), 135.18, 108.56, 101.09 (3d; 3 arom. CH), 67.72 (t; OCH<sub>2</sub>). **UV-VIS**: λ(nm) = 279.0, 315.0. **IR**: γ(cm<sup>-1</sup>) = 1629 (C=O).

**5b**: Yield: 4.17 g (98 %) of light yellow oil. **<sup>1</sup>H-NMR**: δ(ppm) = 9.86 (s; CHO), 7.81, 6.97 (2d, *J* ≈ 8.7 Hz each; 4 arom. H), 4.03 (t, *J* ≈ 6.4 Hz; OCH<sub>2</sub>). **<sup>13</sup>C-NMR**: δ(ppm) = 190.53 (d; CHO), 163.96, 129.82 (2s; 2 arom. C), 131.88, 114.66 (2d; 4 arom. CH), 68.11 (t; OCH<sub>2</sub>). **UV-VIS**: λ(nm) = 275.0. **IR**: γ(cm<sup>-1</sup>) = 1692 (C=O).

**5c**: Yield: 4.72 g (95 %) of white crystals, m.p.: 40 °C (10.6 kJ mol<sup>-1</sup>). **<sup>1</sup>H-NMR**: δ(ppm) = 9.87 (s; CHO); 7.82, 6.97 (2d, *J* ≈ 8.7 Hz each; 4 arom. H), 4.07 (t, *J* ≈ 5.9 Hz; OCH<sub>2</sub>). **<sup>13</sup>C-NMR**: δ(ppm) = 190.50 (d; CHO), 163.66, 130.03 (2s; 2 arom. C), 131.89, 114.64 (2d; 4 arom. CH), 67.60 (t; OCH<sub>2</sub>). **UV-VIS**: λ(nm) = 276.0. **IR**: γ(cm<sup>-1</sup>) = 1688 (C=O).

### 3.2. Synthesis of the imines **6** and **7**:

Compounds **6a-c** and **7a-c** were prepared as described previously<sup>2</sup> by p-toluenesulfonic acid (40 mg) catalyzed condensation of the semifluorinated alkyloxybenzaldehydes **4** or **5** (2.5 mmol) with (*S*)-4-(2-methylbutoxy)aniline (3 mmol) in 25 ml toluene. The compounds were purified by crystallization from acetone/methanol.

**6a**: Yield: 0.80 g (73%) of yellow crystals. **<sup>1</sup>H-NMR**: δ = 13.90 (s; OH), 8.48 (s; HC=N), 7.22-7.19 (m; 3 arom. H), 6.91 (d, *J* ≈ 8.7 Hz; 2 arom. H), 6.47-6.43 (m; 2 arom. H), 3.97 (t, *J*

$\approx 6.6$  Hz; OCH<sub>2</sub>), 3.82, 3.74 (2dd,  $J \approx 8.9$  Hz and  $J \approx 6.0$  Hz each; OCH<sub>2</sub> (chiral alkyl chain)). <sup>13</sup>C-NMR:  $\delta = 163.68, 163.17, 158.13, 141.18, 113.09$  (5s; 5 arom. C), 159.37 (d, HC=N), 133.04, 121.89, 115.18, 107.34, 101.60 (5d; 1, 2, 2, 1 and 1 arom. CH, respectively), 73.24, 68.22 (2t; 2 OCH<sub>2</sub>). UV-VIS:  $\lambda$  (nm) = 285.0, 349.0. IR:  $\gamma = 1615$  cm<sup>-1</sup> (C=N). MS (EI): m/z (%) = 439 (100) [M<sup>+</sup>], 368 (16) [M<sup>+</sup> - C<sub>5</sub>H<sub>11</sub>], 229 (41) [M<sup>+</sup> - C<sub>5</sub>H<sub>11</sub> - C<sub>10</sub>H<sub>21</sub>]. C<sub>28</sub>H<sub>41</sub>NO<sub>3</sub> (439.6); Anal. Calc.: C, 76.49; H, 9.40; N, 3.18. Found: C, 76.54; H, 9.49, N 3.21%.

**6b**: Yield: 1.47 g (98%) of yellow crystals. <sup>1</sup>H-NMR:  $\delta = 13.92$  (s; OH), 8.48 (s; HC=N), 7.23-7.19 (m; 3 arom. H), 6.91 (d,  $J \approx 8.9$  Hz; 2 arom. H), 6.46-6.43 (m; 2 arom. H), 3.99 (t,  $J \approx 6.4$  Hz; OCH<sub>2</sub>), 3.82, 3.74 (2dd,  $J \approx 8.9$  Hz and  $J \approx 6.0$  Hz each; OCH<sub>2</sub> (chiral alkyl chain)). <sup>13</sup>C-NMR:  $\delta = 163.71, 162.99, 158.18, 141.13, 113.20$  (5s; 5 arom. C), 159.33 (d, HC=N), 133.08, 121.91, 115.19, 107.28, 101.58 (5d; 1, 2, 2, 1 and 1 arom. CH, respectively), 73.26, 67.86 (2t; 2 OCH<sub>2</sub>). UV-VIS:  $\lambda$  (nm) = 285.0, 349.0. IR:  $\gamma = 1618$  cm<sup>-1</sup> (C=N). MS (EI): m/z (%) = 601 (100) [M<sup>+</sup>], 531 (41) [M<sup>+</sup> - C<sub>5</sub>H<sub>11</sub>], 229 (43) [M<sup>+</sup> - C<sub>5</sub>H<sub>11</sub> - C<sub>10</sub>H<sub>12</sub>F<sub>9</sub>]. C<sub>28</sub>H<sub>32</sub>F<sub>9</sub>NO<sub>3</sub> (601.6); Anal. Calc.: C, 55.90; H, 5.36; N, 2.32. Found: C, 56.05; H, 5.58, N 2.04%.

**6c**: Yield: 0.97 g (58%) of yellow crystals.  $[\alpha]_{589}^{20} +11.8^\circ$ ,  $c = 0.4$  in CHCl<sub>3</sub>; <sup>1</sup>H-NMR:  $\delta = 13.93$  (s; OH), 8.49 (s; HC=N), 7.22-7.19 (m; 3 arom. H), 6.91 (d,  $J \approx 8.9$  Hz; 2 arom. H), 6.46-6.43 (m; 2 arom. H), 4.02 (t,  $J \approx 5.9$  Hz; OCH<sub>2</sub>), 3.82, 3.74 (2dd,  $J \approx 8.9$  Hz and  $J \approx 6.0$  Hz each; OCH<sub>2</sub> (chiral alkyl chain)). <sup>13</sup>C-NMR:  $\delta = 163.61, 162.62, 158.13, 141.01, 113.34$  (5s; 5 arom. C), 159.20 (d, HC=N), 133.06, 121.87, 115.16, 107.18, 101.56 (5d; 1, 2, 2, 1 and 1 arom. CH, respectively), 73.27, 67.36 (2t; 2 OCH<sub>2</sub>). UV-VIS:  $\lambda$  (nm) = 285.0, 350.0. IR:  $\gamma = 1618$  cm<sup>-1</sup> (C=N). MS (EI): m/z (%) = 673 (100) [M<sup>+</sup>], 603 (53) [M<sup>+</sup> - C<sub>5</sub>H<sub>11</sub>], 229 (35) [M<sup>+</sup> - C<sub>5</sub>H<sub>11</sub> - C<sub>10</sub>H<sub>8</sub>F<sub>13</sub>]. C<sub>28</sub>H<sub>28</sub>F<sub>13</sub>NO<sub>3</sub> (673.5); Anal. Calc.: C, 49.93; H, 4.19; N, 2.08. Found: C, 50.17; H, 4.41, N 1.85%.



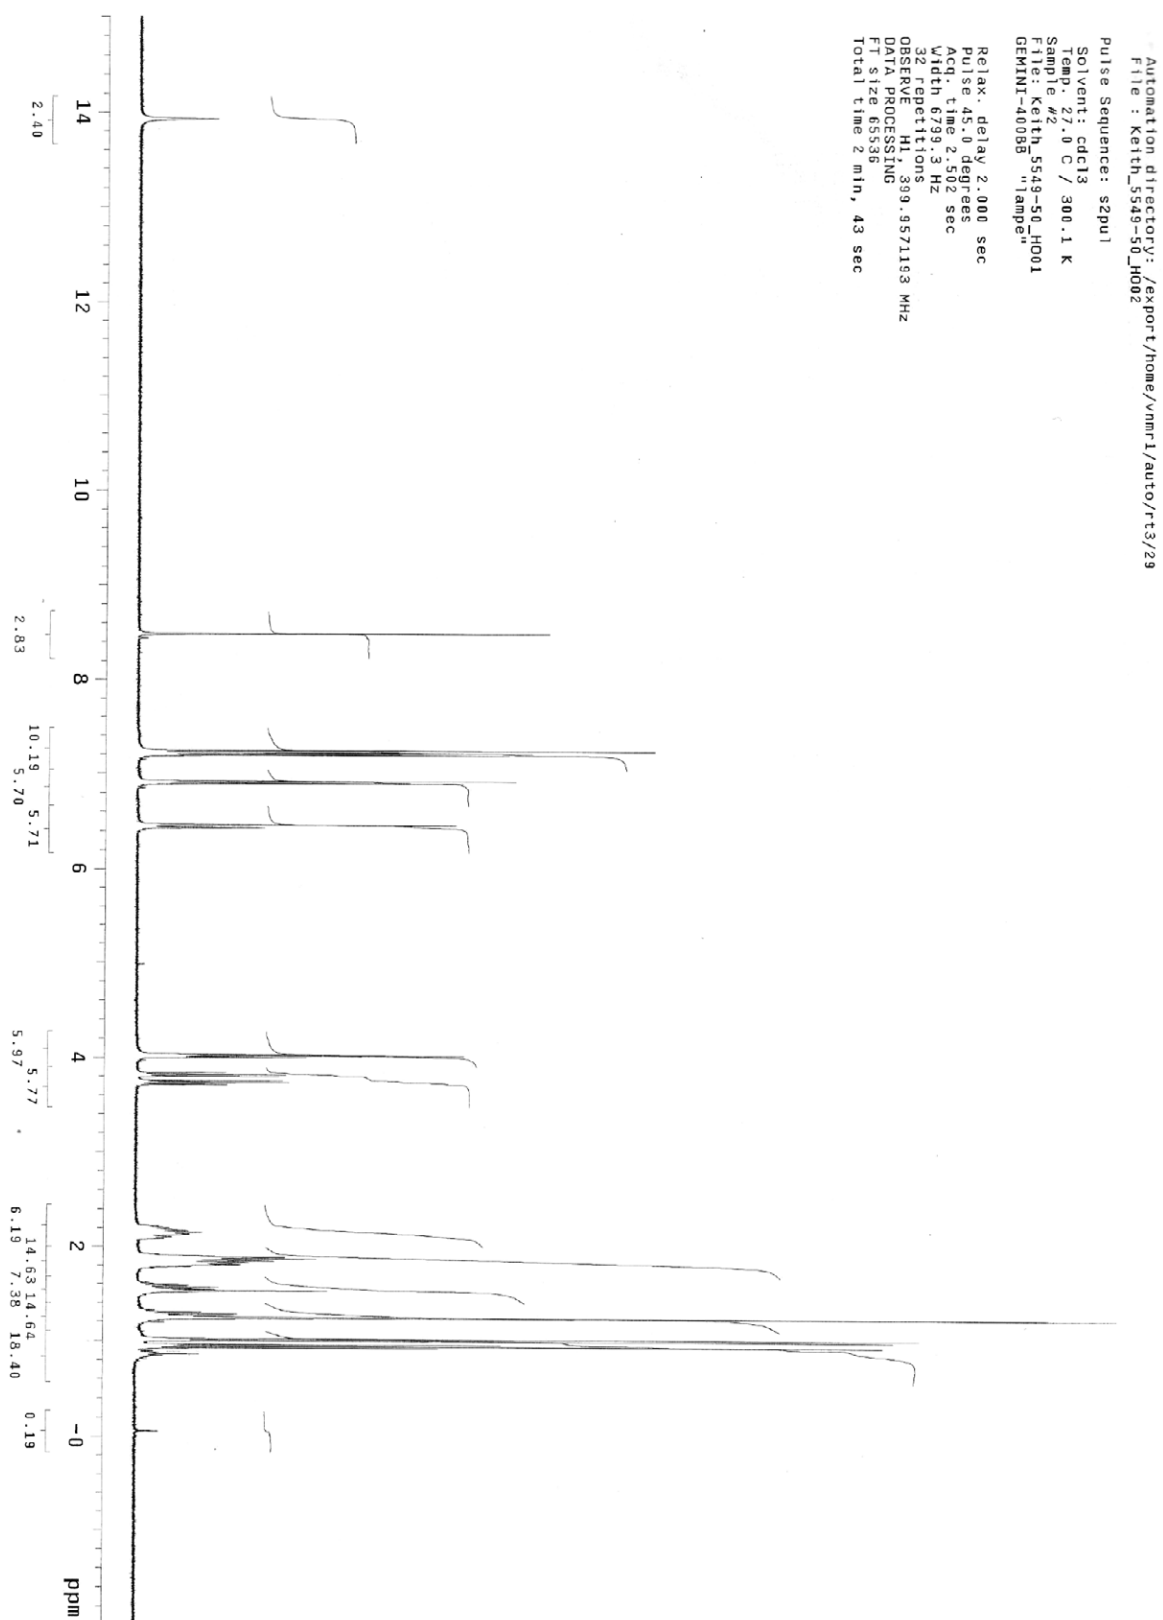

Figure S6. <sup>1</sup>H-NMR spectrum of compound 6c.

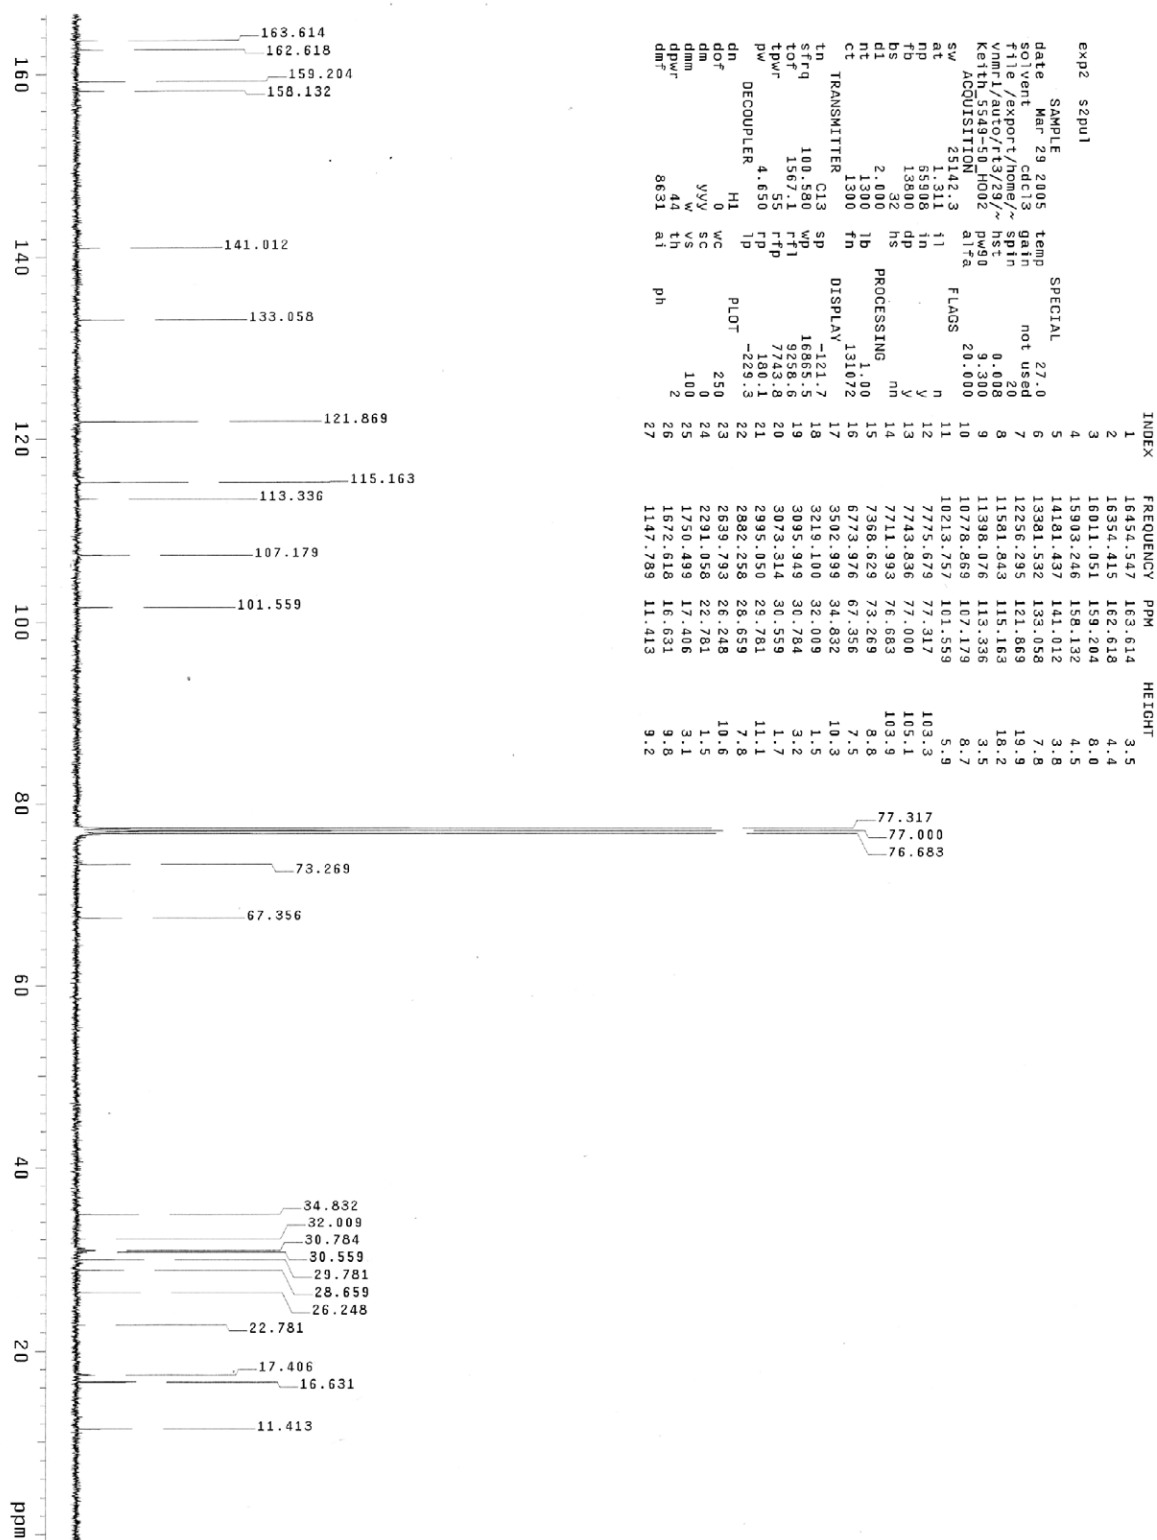

Figure S7. <sup>13</sup>C-NMR spectrum of compound 6c.

**7a:** Yield: 0.47 g (44%) of white crystals.  $^1\text{H-NMR}$ :  $\delta$  = 8.37 (s;  $\underline{\text{H}}\text{C}=\text{N}$ ), 7.79, 7.17, 6.94, 6.90 (4d,  $J \approx 8.9$  Hz each; 8 arom. H), 4.00 (t,  $J \approx 6.5$  Hz;  $\text{OCH}_2$ ), 3.82, 3.73 (2dd,  $J \approx 8.9$  Hz and  $J \approx 6.0$  Hz each;  $\text{OCH}_2$  (chiral alkyl chain)).  $^{13}\text{C-NMR}$ :  $\delta$  = 157.60 (d,  $\text{HC}=\text{N}$ ), 161.45, 157.62, 145.02, 129.26 (4s; 4 arom. C), 130.08, 121.91, 114.94, 114.60 (4d; 8 arom. CH), 73.23, 68.22 (2t; 2  $\text{OCH}_2$ ). **UV-VIS**:  $\lambda$  (nm) = 284.0, 335.0. **IR**:  $\gamma$  = 1606  $\text{cm}^{-1}$  (C=N). **MS** (EI):  $m/z$  (%) = 423 (100) [ $\text{M}^+$ ], 353 (41) [ $\text{M}^+ - \text{C}_5\text{H}_{11}$ ], 213 (39) [ $\text{M}^+ - \text{C}_5\text{H}_{11} - \text{C}_{10}\text{H}_{21}$ ].  **$\text{C}_{28}\text{H}_{41}\text{NO}_2$**  (423.6); Anal. Calc.: C, 79.38; H, 9.75; N, 3.30. Found: C, 79.46; H, 10.03, N 3.35%.

**7b:** Yield: 0.82 g (56%) of white crystals.  $^1\text{H-NMR}$ :  $\delta$  = 8.38 (s;  $\underline{\text{H}}\text{C}=\text{N}$ ), 7.79, 7.17, 6.94, 6.89 (4d,  $J \approx 8.9$  Hz each; 4 arom. H), 4.0 (t,  $J \approx 6.4$  Hz;  $\text{OCH}_2$ ), 3.82, 3.73 (2dd,  $J \approx 8.9$  Hz and  $J \approx 6.0$  Hz each;  $\text{OCH}_2$  (chiral alkyl chain)).  $^{13}\text{C-NMR}$ :  $\delta$  = 157.58 (d,  $\text{HC}=\text{N}$ ), 161.30, 157.64, 144.95, 129.38 (4s; 4 arom. C), 130.12, 121.92, 114.96, 114.58 (4d; 8 arom. CH), 73.24, 67.87 (2t; 2  $\text{OCH}_2$ ). **UV-VIS**:  $\lambda$  (nm) = 284.0, 335.0. **IR**:  $\gamma$  = 1604  $\text{cm}^{-1}$  (C=N). **MS** (EI):  $m/z$  (%) = 585 (100) [ $\text{M}^+$ ], 515 (90) [ $\text{M}^+ - \text{C}_5\text{H}_{11}$ ], 213 (43) [ $\text{M}^+ - \text{C}_5\text{H}_{11} - \text{C}_{10}\text{H}_{12}\text{F}_9$ ].  **$\text{C}_{28}\text{H}_{32}\text{F}_9\text{NO}_2$**  (585.5); Anal. Calc.: C, 57.43; H, 5.50; N, 2.39. Found: C, 57.69; H, 5.71, N 2.11 %.

**7c:** Yield: 0.61 g (37%) of white crystals.  $^1\text{H-NMR}$ :  $\delta$  = 8.39 (s;  $\underline{\text{H}}\text{C}=\text{N}$ ), 7.81, 7.18, 6.94, 6.90 (4d,  $J \approx 8.9$  Hz each; 8 arom. H), 4.05 (t,  $J \approx 5.8$  Hz;  $\text{OCH}_2$ ), 3.82, 3.73 (2dd,  $J \approx 8.9$  Hz and  $J \approx 6.0$  Hz each;  $\text{OCH}_2$  (chiral alkyl chain)).  $^{13}\text{C-NMR}$ :  $\delta$  = 157.41 (d,  $\text{HC}=\text{N}$ ), 161.01, 157.66, 144.90, 129.61 (4s; 4 arom. C), 130.13, 121.98, 114.90, 114.59 (4d; 8 arom. CH), 73.22, 67.35 (2t; 2  $\text{OCH}_2$ ). **UV-VIS**:  $\lambda$  (nm) = 283.0, 335.0. **IR**:  $\gamma$  = 1607  $\text{cm}^{-1}$  (C=N). **MS** (EI):  $m/z$  (%) = 657 (100) [ $\text{M}^+$ ], 587 (96) [ $\text{M}^+ - \text{C}_5\text{H}_{11}$ ], 212 (27) [ $\text{M}^+ - \text{C}_5\text{H}_{11} - \text{C}_{10}\text{H}_8\text{F}_{13}$ ].  **$\text{C}_{28}\text{H}_{28}\text{F}_{13}\text{NO}_2$**  (657.5); Anal. Calc.: C, 51.14; H, 4.29; N, 2.13. Found: C, 51.36; H, 4.47, N 1.89%.

### 3.3. Synthesis of the copper(II) complexes **8**:

A suspension of 0.5 mmol of the appropriate ligand in dry ethanol (5 ml) was added 0.5 mmol of KOH dissolved in 10 ml of dry ethanol and 0.25 mmol of copper(II)acetate dihydrate. The mixture was stirred at room temperature under an argon atmosphere for 24 h; the greenish or greenish brown solid formed was filtered and recrystallized from chloroform/ethanol.

**8a:** Yield: 0.21 g (45%) of brown crystals. **UV-VIS:**  $\lambda(\text{nm}) = 309.0, 381.0$ . **IR:**  $\gamma = 1610 \text{ cm}^{-1}$  (C=N). **MS (EI):**  $m/z (\%) = 940 (24) [\text{M}^+], 439 (100) [\text{M}^+ - \text{C}_{28}\text{H}_{40}\text{NO}_3], 299 (26) [\text{M}^+ - \text{C}_{28}\text{H}_{40}\text{NO}_3 - \text{C}_{10}\text{H}_{21}], 229 (60) [\text{M}^+ - \text{C}_{28}\text{H}_{40}\text{NO}_3 - \text{C}_{10}\text{H}_{21} - \text{C}_5\text{H}_{11}]$ . **C<sub>56</sub>H<sub>80</sub>CuN<sub>2</sub>O<sub>6</sub>** (940.8); Anal. Calc.: C, 71.49; H, 8.57; N, 2.98. Found: C, 71.56; H, 8.37, N 3.09%.

**8b:** Yield: 0.46 g (73%) of yellow-brown crystals. **UV-VIS:**  $\lambda(\text{nm}) = 307.0, 380.0$ . **IR:**  $\gamma = 1612 \text{ cm}^{-1}$  (C=N). **C<sub>56</sub>H<sub>62</sub>CuF<sub>18</sub>N<sub>2</sub>O<sub>6</sub>** (1264.6); Anal. Calc.: C, 53.18; H, 4.94; N, 2.21. Found: C, 52.97; H, 4.69, N 2.11%.

**8c:** Yield: 0.52 g (74%) of yellow-brown crystals. **UV-VIS:**  $\lambda(\text{nm}) = 302.0, 381.0$ . **IR:**  $\gamma = 1611 \text{ cm}^{-1}$  (C=N). **C<sub>56</sub>H<sub>54</sub>CuF<sub>26</sub>N<sub>2</sub>O<sub>6</sub>** (1408.5); Anal. Calc.: C, 47.75; H, 3.86; N, 1.98. Found: C, 47.94; H, 4.09, N 1.78%.

## References

- 
- S1 (a) O.N. Bubel, V.S. Bezbodov, Y.L. Ptashnikov, *Zh. Org. Khim.*, 1979, **15**, 803; (b) R. M. Claramunt, I. Forfar, P. Cabildo, J. Lafuente, J. Barbare, R. Gimenez, J. Elguero, *Heterocycles*, 1999, **51**, 751.  
S2 K. Praefcke, D. Singer, B. Gündogan, *Mol. Cryst. Liq. Cryst.* 1992, **223**, 181.
